# Supplementary material for: Multi-tissue DNA methylation age predictor in mouse
Source: PubMed Central journal article supplement (PMC5389178; doi:10.1186/s13059-017-1203-5), 2017-04-11
Supplement: 13059_2017_1203_MOESM10_ESM.pdf [file 13059_2017_1203_MOESM10_ESM.pdf]

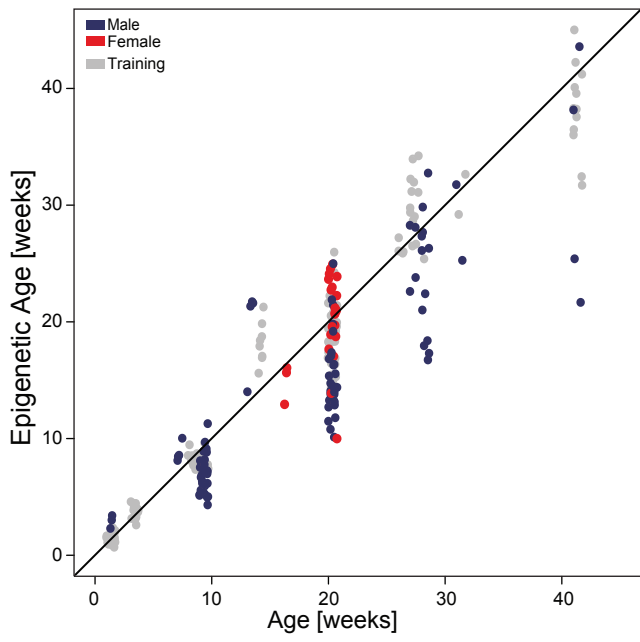

**Additional File 10: Predicted age of test samples as coloured by sex, related to Figure 4.**  
The training data is shown in the background in grey.
